# Supplementary material for: Tailored digital behaviour change intervention with e-referral system to increase attendance at NHS stop smoking services (the MyWay project): study protocol for a randomised controlled feasibility trial
Source: PubMed Central journal article supplement — BMJ Open. 2019 Apr 8;9(4):e028721. doi: 10.1136/bmjopen-2018-028721 (PMC6500333; doi:10.1136/bmjopen-2018-028721), 2019-04-08
Supplement: bmjopen-2018-028721.reviewer_comments.pdf [file bmjopen-2018-028721.reviewer_comments.pdf]

## PEER REVIEW HISTORY

BMJ Open publishes all reviews undertaken for accepted manuscripts. Reviewers are asked to complete a checklist review form (<http://bmjopen.bmj.com/site/about/resources/checklist.pdf>) and are provided with free text boxes to elaborate on their assessment. These free text comments are reproduced below.

## ARTICLE DETAILS

|                            |                                                                                                                                                                                                                |
|----------------------------|----------------------------------------------------------------------------------------------------------------------------------------------------------------------------------------------------------------|
| <b>TITLE (PROVISIONAL)</b> | A tailored digital behaviour change intervention with e-referral system to increase attendance at NHS Stop Smoking Services (The MyWay Project): study protocol for a randomised controlled feasibility trial. |
| <b>AUTHORS</b>             | Fulton, Emily; Newby, Katie; Gokal, Kajal; Kwah, Kayleigh; Schumacher, Lauren; Jackson, Louise J; Naughton, Felix; Coleman, Tim; Brown, Katherine                                                              |

This article was not externally reviewed at BMJ Open. Protocols that have been independently assessed prior to submission to BMJ Open are usually fast-tracked to publication on the grounds that further substantial changes will not be possible. This independent assessment will usually be external, independent review for both a substantial grant award from a non-commercial or government funder and ethics approval.
